# Supplementary material for: Combination therapy targeting both innate and adaptive immunity improves survival in a pre-clinical model of ovarian cancer
Source: PubMed Central journal article supplement (PMC6668091; doi:10.1186/s40425-019-0654-5), 2019-07-30
Supplement: 40425_2019_654_MOESM2_ESM.pdf [file 40425_2019_654_MOESM2_ESM.pdf]

## Supplementary Figure 2.

a

### Significant Terms For: Pathway

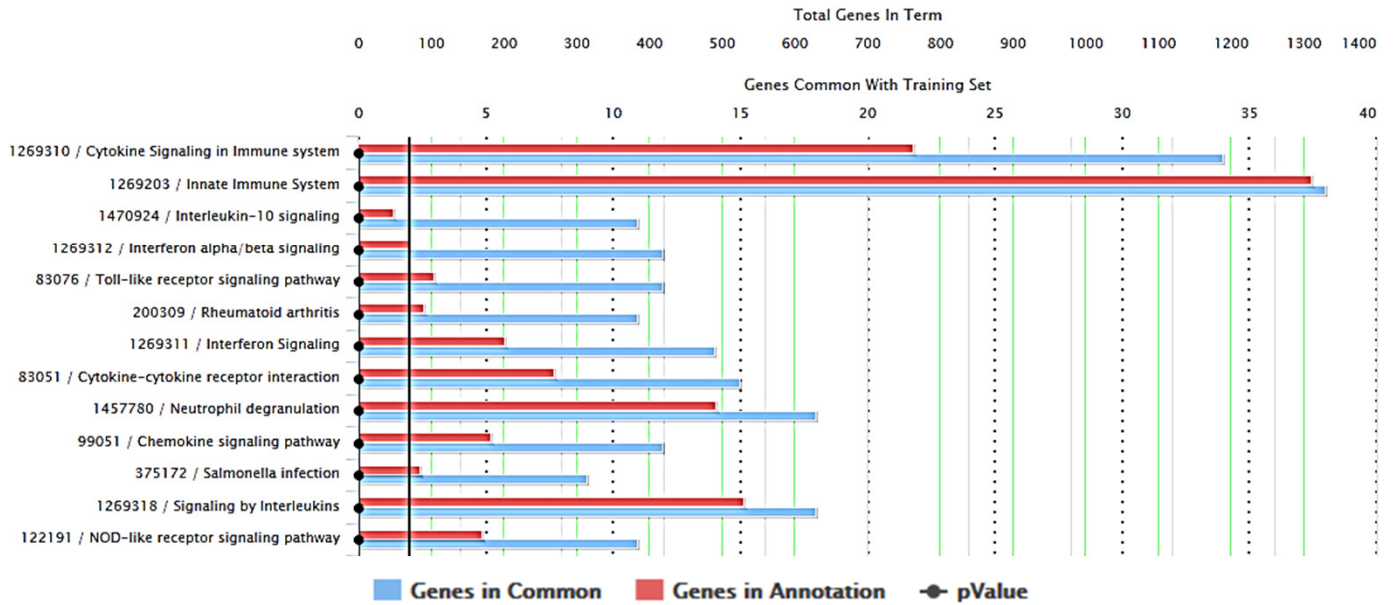

b

| ID | Name                                                                                                                                                                                        | pValue    | FDR B&H   | Genes from Input | Genes in Annotation |
|----|---------------------------------------------------------------------------------------------------------------------------------------------------------------------------------------------|-----------|-----------|------------------|---------------------|
| 1  | M2568<br>Genes up-regulated in lung tissue upon LPS aspiration with mechanical ventilation (MV) compared to control (PBS aspiration without MV).                                            | 8.832E-38 | 6.185E-34 | 25               | 128                 |
| 2  | 19795415-Table1<br>Mouse Lung Beisiegel09 262genes                                                                                                                                          | 9.697E-29 | 3.395E-25 | 23               | 207                 |
| 3  | 16479545-Table2<br>Mouse Lung not cancer Kahnert06 70genes                                                                                                                                  | 3.788E-28 | 8.842E-25 | 16               | 50                  |
| 4  | 12446012-Table2<br>Mouse Immune Carmody02 151genes                                                                                                                                          | 1.415E-25 | 2.478E-22 | 18               | 112                 |
| 5  | 20220088-SuppTable2a<br>Human Immune Allen10 106genes                                                                                                                                       | 2.142E-24 | 3.000E-21 | 17               | 103                 |
| 6  | M3302<br>Genes down-regulated in comparison of unstimulated peripheral blood mononuclear cells (PBMC) 3 days after stimulation with YF17D vaccine versus PBMC 7 days after the stimulation. | 4.178E-24 | 4.877E-21 | 20               | 199                 |
| 7  | 20460173-ImmPortAntimicrobials<br>Human Immune Kong10 544genes ImmPort Antimicrobials                                                                                                       | 3.231E-23 | 3.233E-20 | 25               | 469                 |
| 8  | M3010<br>Genes transcriptionally modulated in the blood of multiple sclerosis patients in response to subcutaneous treatment with recombinant IFNβ1 [GeneID = 3456].                        | 3.775E-23 | 3.304E-20 | 16               | 95                  |
| 9  | M14829<br>Genes down-regulated in hematopoietic precursor cells conditionally expressing HOXA9 and MEIS1 [GeneID=3205,4211].                                                                | 8.957E-23 | 6.970E-20 | 15               | 77                  |
| 10 | M3296<br>Genes down-regulated in comparison of unstimulated peripheral blood mononuclear cells (PBMC) 1 day after stimulation with YF17D vaccine versus PBMC 7 days after the stimulation.  | 1.744E-22 | 1.036E-19 | 19               | 199                 |
| 11 | M5932<br>Genes defining inflammatory response.                                                                                                                                              | 1.922E-22 | 1.036E-19 | 19               | 200                 |
| 12 | M5913<br>Genes up-regulated in response to IFNG [GeneID=3458].                                                                                                                              | 1.922E-22 | 1.036E-19 | 19               | 200                 |
| 13 | M7237<br>Genes down-regulated in thymus cortical regions: subcapsular versus central cortical.                                                                                              | 1.922E-22 | 1.036E-19 | 19               | 200                 |
| 14 | 16081686-SuppTable2<br>Human Lymphoma Tome05 357genes                                                                                                                                       | 3.171E-21 | 1.586E-18 | 17               | 155                 |
| 15 | M3288<br>Genes down-regulated in comparison of unstimulated peripheral blood mononuclear cells (PBMC) versus PBMC 7 days after stimulation with YF17D vaccine.                              | 7.418E-21 | 3.056E-18 | 18               | 200                 |
| 16 | M9572<br>Genes up-regulated in cells from peripheral lymph nodes: T reg versus T conv.                                                                                                      | 7.418E-21 | 3.056E-18 | 18               | 200                 |
| 17 | M7320<br>Genes up-regulated in HMC-1 (mast leukemia) cells: incubated with the peptide ALL1 and then treated with CI-IB-MECA [PubChem=3035850] versus stimulation by T cell membranes.      | 7.418E-21 | 3.056E-18 | 18               | 200                 |
| 18 | M1430<br>Genes defining differentiation potential of the bipotential myeloid cell line FDB.                                                                                                 | 9.472E-21 | 3.685E-18 | 17               | 165                 |
| 19 | 17174972-TableS1<br>Human Zola07 426genes CellDifferentiationMarkers                                                                                                                        | 1.089E-20 | 4.014E-18 | 21               | 345                 |
| 20 | M1920<br>Genes forming the macrophage-enriched metabolic network (MEMN) claimed to have a causal relationship with the metabolic syndrom traits.                                            | 1.273E-20 | 4.458E-18 | 32               | 1210                |
