# Supplementary material for: Combination therapy targeting both innate and adaptive immunity improves survival in a pre-clinical model of ovarian cancer
Source: PubMed Central journal article supplement (PMC6668091; doi:10.1186/s40425-019-0654-5), 2019-07-30

Supplementary Figure 5.

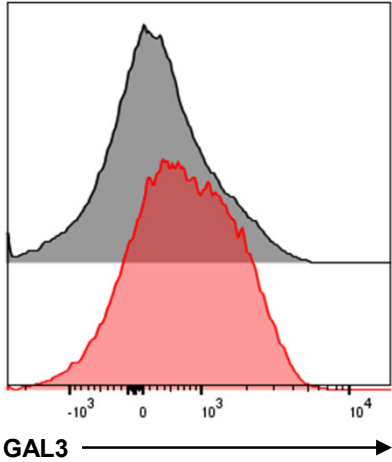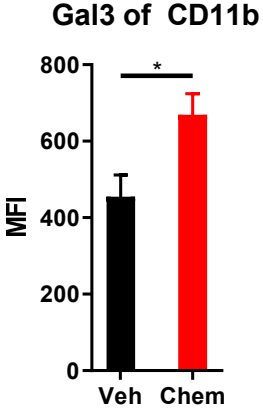

Supplement: 40425_2019_654_MOESM5_ESM.pdf [file 40425_2019_654_MOESM5_ESM.pdf]
