# Supplementary material for: Combination therapy targeting both innate and adaptive immunity improves survival in a pre-clinical model of ovarian cancer
Source: PubMed Central journal article supplement (PMC6668091; doi:10.1186/s40425-019-0654-5), 2019-07-30
Supplement: 40425_2019_654_MOESM14_ESM.pdf [file 40425_2019_654_MOESM14_ESM.pdf]

**Supplementary Table S1. Antibodies used for flow cytometry experiments**

| <b>Antigen</b> | <b>Conjugate</b> | <b>Clone</b> | <b>Vendor</b> |
|----------------|------------------|--------------|---------------|
| Arg1           | APC              | Met1-Lys322  | R&D Systems   |
| B220           | PE               | RA3-6B2      | BioLegend     |
| CD107a         | APC/Cy7          | 1D4B         | BioLegend     |
| CD11b          | PE/Cy5           | M1/70        | BioLegend     |
| CD11c          | BV421            | N418         | BioLegend     |
| CD3            | FITC             | 17A2         | BioLegend     |
| CD3            | APC              | 17A2         | BioLegend     |
| CD4            | PE/Cy5           | GK1.5        | BioLegend     |
| CD44           | PE/Cy7           | IM7          | BioLegend     |
| CD45           | AF 700           | 30-F11       | BioLegend     |
| CD69           | BV421            | H1.2F3       | BioLegend     |
| CD8a           | FITC             | 5H10-1       | BioLegend     |
| CD8a           | PE-Cy7           | 53-6.7       | BioLegend     |
| CD80           | PE/Cy5           | 16-10A1      | BioLegend     |
| CD86           | BV605            | GL-1         | BioLegend     |
| EOMES          | AF488            | Met1-Ser126  | R&D Systems   |
| F4/80          | PerCP/Cy5.5      | BM8          | BioLegend     |
| FoxP3          | Pacific Blue     | MF-14        | BioLegend     |
| Gal3           | PE               | Gal397       | BioLegend     |
| GZMB           | PE/Cy7           | QA16A02      | BioLegend     |
| ICOS           | PE               | 7E.17G9      | BioLegend     |
| IFN $\gamma$   | PE-Dazzle 594    | XMG1.2       | BioLegend     |
| IL-10          | PE-Cy7           | JES5-16E3    | BioLegend     |
| IL-2           | Pacific Blue     | JES6-5H4     | BioLegend     |
| IRF3           | AF 647           | D601M        | CST           |
| Ly6C           | AF700            | HK1.4        | BioLegend     |
| Ly6G           | PerCP            | 1A8          | BioLegend     |
| MHCII          | PacificBlue      | M5/114.15.2  | BioLegend     |
| NKp46          | PE               | 29A1.4       | BioLegend     |
| PD-1           | BV605            | 29F.1A12     | BioLegend     |
| ROR $\gamma$ t | PE               | Met1-Arg10   | R&D Systems   |
| Tbet           | BV605            | 4B10         | BioLegend     |
