# Supplementary material for: Combination therapy targeting both innate and adaptive immunity improves survival in a pre-clinical model of ovarian cancer
Source: PubMed Central journal article supplement (PMC6668091; doi:10.1186/s40425-019-0654-5), 2019-07-30
Supplement: 40425_2019_654_MOESM15_ESM.pdf [file 40425_2019_654_MOESM15_ESM.pdf]

Supplementary Table S2. Summary of all triple immunotherapy combinations evaluated

| Combinations | Chemo | all-10 | GR-MD-02 | a4-1BB | 2:3'-cGAMP | gemcitabine | aPD-L1 | Significance | p-value |
|--------------|-------|--------|----------|--------|------------|-------------|--------|--------------|---------|
| a            |       |        |          |        |            |             |        | ns           | 0.4832  |
| b            |       |        |          |        |            |             |        | ns           | 0.2408  |
| c            |       |        |          |        |            |             |        | ****         | <0.0001 |
| d            |       |        |          |        |            |             |        | **           | 0.0049  |
| e            |       |        |          |        |            |             |        | ****         | <0.0001 |
